# Supplementary material
Source: MDPI journal article supplement (https://www.mdpi.com/2071-1050/9/6/1044)
Supplement: s1 [file s1]

**Table S1:** Initial soil properties of the experimental field at 0-15 cm soil layer.

| Parameter                                    | Method of Analysis                  | Value |
|----------------------------------------------|-------------------------------------|-------|
| pH                                           | Saturation Extract                  | 7.6   |
| EC (dS m <sup>-1</sup> )                     | Water suspension                    | 0.34  |
| Organic Carbon (%)                           | Rapid titration method              | 0.50  |
| Available Nitrogen (kg ha <sup>-1</sup> )    | Alkaline permanganate               | 95    |
| Available Phosphorous (kg ha <sup>-1</sup> ) | Olsen's colorimeter method          | 16    |
| Available Potassium (kg ha <sup>-1</sup> )   | Flame photometer method             | 281   |
| Available Sulphur (kg ha <sup>-1</sup> )     | Turbidometry method                 | 16    |
| Available Iron (ppm)                         | Atomic absorption spectrophotometer | 13.04 |

**Table S2:** Summary of the tillage, crop establishment, residue management and legume integration under various treatments in the study.

| Treatments<br>Abbreviation | Tillage and crop establishment                                                                                                                                   |                                                                                                                              | Residue<br>management |
|----------------------------|------------------------------------------------------------------------------------------------------------------------------------------------------------------|------------------------------------------------------------------------------------------------------------------------------|-----------------------|
|                            | Rice                                                                                                                                                             | Wheat                                                                                                                        | Both crops            |
| CTR-CTW                    | 3 passes of dry tillage with harrow, 2 passes of cultivator in ponded water followed by 1 planking. Rice seedlings were manually transplanted in random geometry | 2 passes of harrow, 1 pass of cultivator followed by 1 planking. Wheat seeds were broadcasted in random geometry             | All removed           |
| CTR-CTW+GG                 | Same as CTR-CTW                                                                                                                                                  | Same as CTR-CTW. Green gram seeds soaked overnight and broadcasted at last irrigation of wheat                               | All removed           |
| ZTR-ZTW                    | No preparatory tillage. Dry rice seeds were directly seeded on flat soil in row geometry using no-till seed-cum-fertilizer drill.                                | No preparatory tillage. Wheat seeds are directly seeded on flat soil in row geometry using no-till seed-cum-fertilizer drill | All removed           |
| ZTR-ZTW+GG                 | Same as ZTR-ZTW                                                                                                                                                  | Same as ZTR-ZTW. Green gram seeds soaked overnight and broadcasted at last irrigation of wheat                               | All removed           |
| ZTR-ZTW+R                  | Same as in ZTR-ZTW except that seeding was done with 'turbo-happy                                                                                                | Same as in ZTR-ZTW except that seeding was done with 'turbo-happy seeder'                                                    | All retained          |

|              |                                                                                                      |                                                                                                              |              |
|--------------|------------------------------------------------------------------------------------------------------|--------------------------------------------------------------------------------------------------------------|--------------|
| ZTR-ZTW+R+GG | seeder' a no-till drill<br>that can seed in<br>presence of crop<br>residues<br>Same as ZTR-<br>ZTW+R | Same as ZTR-ZTW+R.<br>Green gram seeds<br>soaked overnight and<br>broadcasted at last<br>irrigation of wheat | All retained |
|--------------|------------------------------------------------------------------------------------------------------|--------------------------------------------------------------------------------------------------------------|--------------|

**Table S3:** Estimates of carbon emissions for a range of farm operations and agricultural inputs and energy use.

| <b>Agronomic inputs/Farm operation</b>   | <b>Unit</b> | <b>Equivalent CO<sub>2</sub> emission (kg CO<sub>2</sub>-eq per unit)</b> | <b>References</b>        |
|------------------------------------------|-------------|---------------------------------------------------------------------------|--------------------------|
| Seed (Rice and Wheat)                    | kg          | 0.48                                                                      | (West and Marland, 2002) |
| Harrowing                                | ha          | 21.27                                                                     | (Lal, 2004)              |
| Puddling (wet tillage)                   | ha          | 21.27                                                                     | (Lal, 2004)              |
| Planking                                 | ha          | 7.33                                                                      | (Lal, 2004)              |
| Field cultivation                        | ha          | 14.67                                                                     | (Lal, 2004)              |
| No-till drilling                         | ha          | 13.93                                                                     | (Lal, 2004)              |
| Energy use                               | MJ          | 0.97                                                                      | (GHG protocol, 2003)     |
| Herbicide                                | kg/L        | 23.10                                                                     | (Lal, 2004)              |
| Fungicide                                | kg/L        | 14.30                                                                     | (Lal, 2004)              |
| Insecticide                              | kg/L        | 18.70                                                                     | (Lal, 2004)              |
| N fertilizer                             | kg          | 4.77                                                                      | (Lal, 2004)              |
| P <sub>2</sub> O <sub>5</sub> fertilizer | kg          | 0.73                                                                      | (Lal, 2004)              |
| K <sub>2</sub> O fertilizer              | kg          | 0.55                                                                      | (Lal, 2004)              |
